# Supplementary material
Source: PubMed Central journal article supplement (PMC2596074)
Supplement: NIHMS60107-supplement-SI7.pdf [file NIHMS60107-supplement-SI7.pdf]

**Supporting Information:**

**Synthesis and Characterization of Ruthenium Bis( $\beta$ -diketonato)  
Pyridine-Imidazole Complexes for Hydrogen Atom Transfer**

Adam Wu, Joshua Masland, Rodney D. Swartz,<sup>†</sup> Werner Kaminsky,<sup>†</sup> and James M. Mayer\*  
Department of Chemistry, University of Washington, Campus Box 351700,  
Seattle, WA, 98195-1700, USA

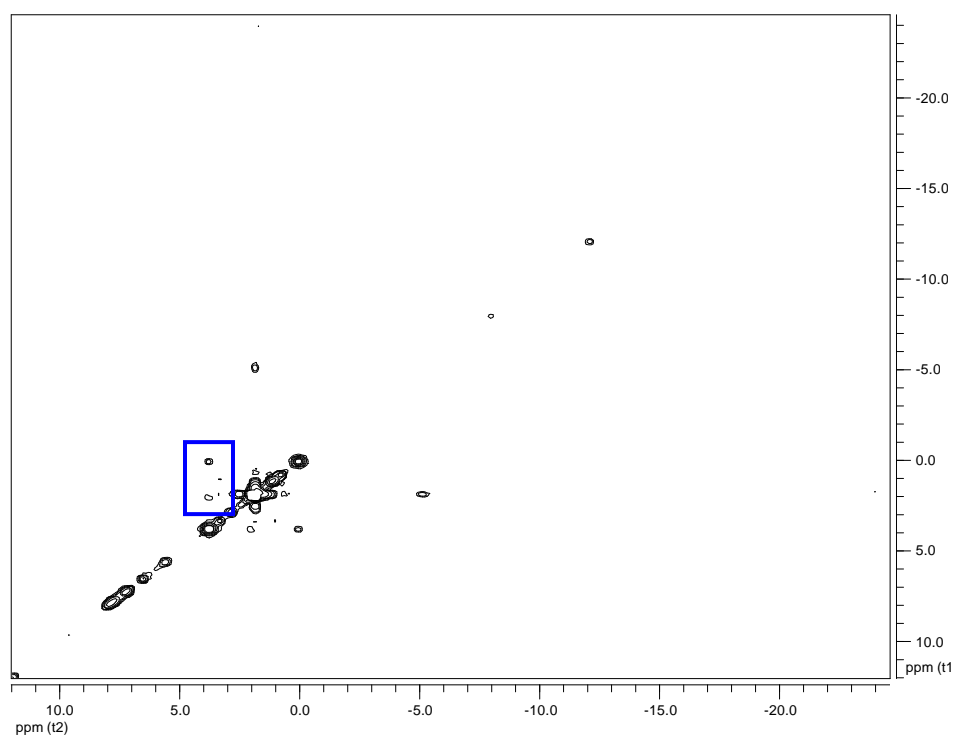

**Figure S1.**  $^1\text{H}$  2D COSY NMR spectrum of  $[\text{Ru}^{\text{III}}(\text{acac})_2(\text{py-imH})]\text{OTf}$  (**2**) in  $\text{CD}_3\text{CN}$ . The two cross peaks ( $\delta$  3.91 couples to  $\delta$  0.07 and 2.14) are highlighted in the rectangular box.

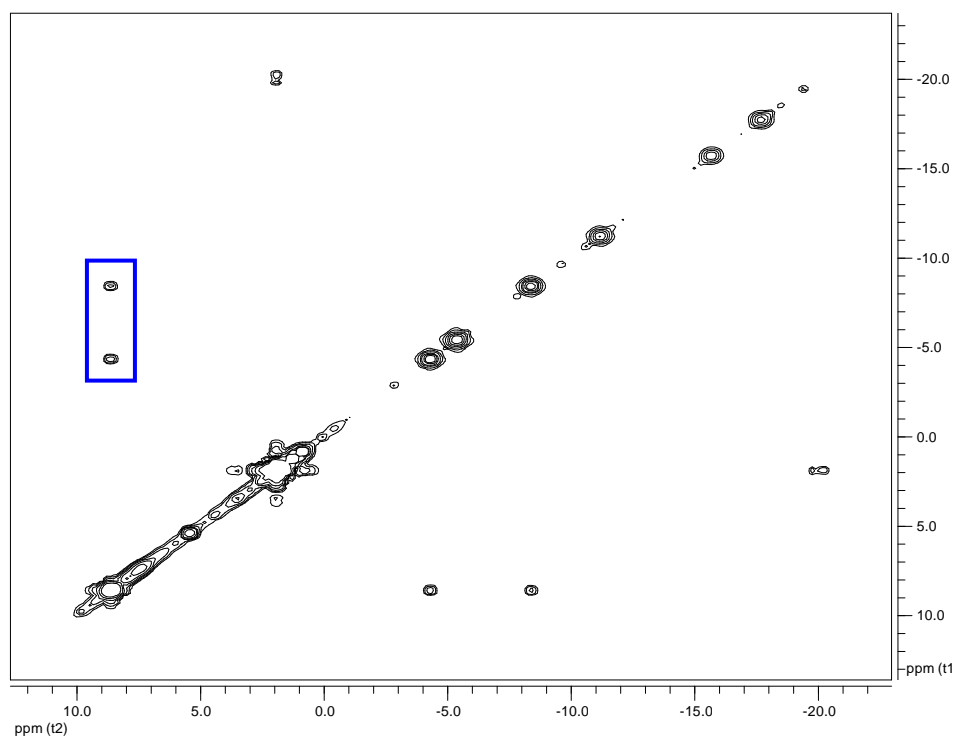

**Figure S2.**  $^1\text{H}$  2D COSY NMR spectrum of  $\text{Ru}^{\text{III}}(\text{acac})_2(\text{py-im})$  (**3**) in  $\text{CD}_3\text{CN}$ . The two cross peaks ( $\delta$  8.75 couples to  $\delta$  -8.56 and -4.46) are highlighted in the rectangular box.

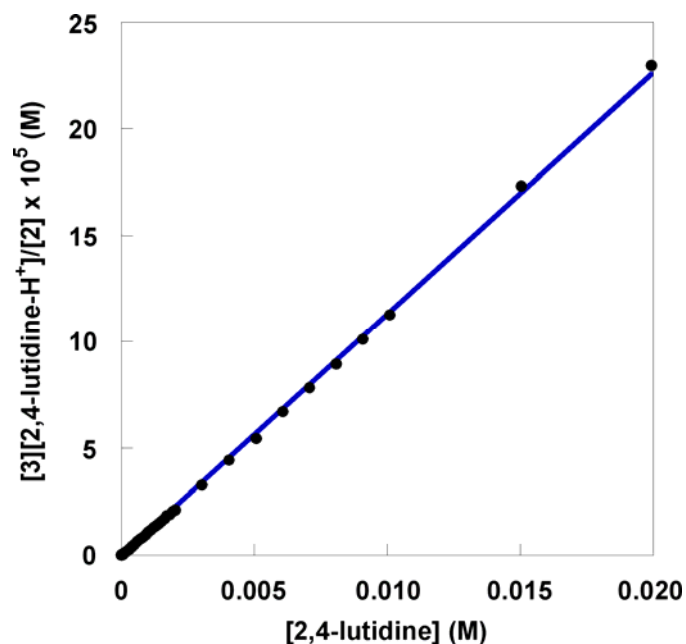

**Figure S3.** Plot of  $[\mathbf{3}][2,4\text{-lutidine-H}^+]/[\mathbf{2}]$  vs.  $[2,4\text{-lutidine}]$  for the equilibrium titration:  $[\text{Ru}^{\text{III}}(\text{acac})_2(\text{py-imH})]\text{OTf}$  (**2**) + 2,4-lutidine  $\rightleftharpoons$   $\text{Ru}^{\text{III}}(\text{acac})_2(\text{py-im})$  (**3**) + (2,4-lutidine-H)OTf in MeCN. The slope of the linear plot ( $R^2 = 0.999$ ) is the equilibrium constant  $K_{\text{eq}} = 0.011 \pm 0.001$ .

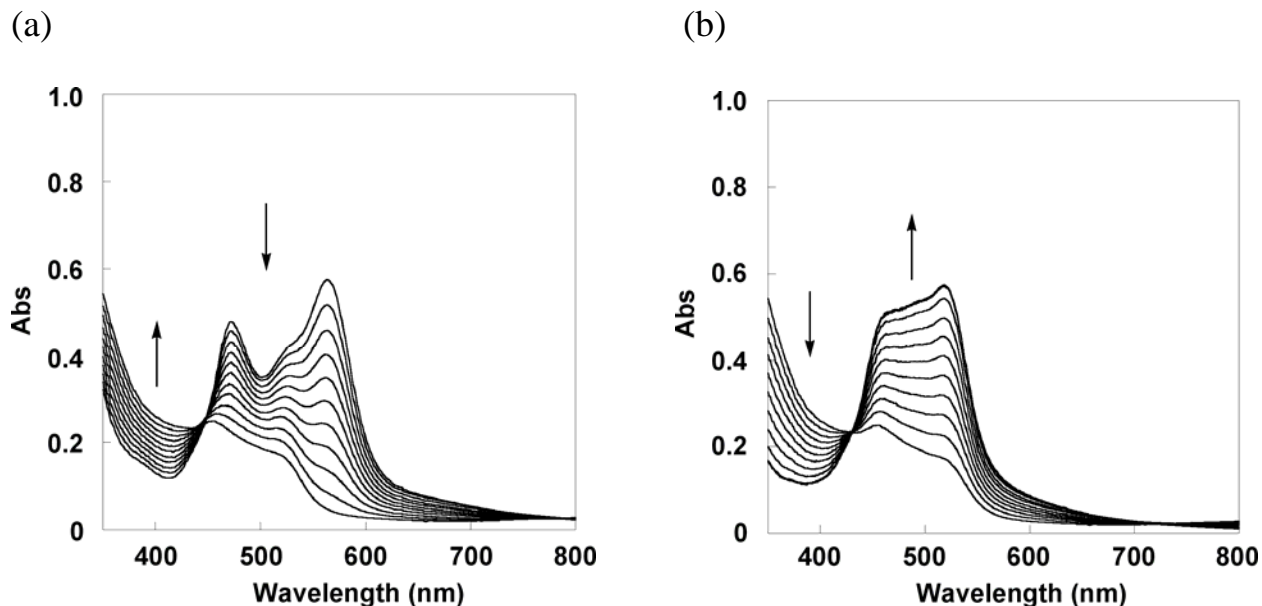

**Figure S4.** UV-vis titration plots of (a) [DBU-H][Ru<sup>II</sup>(hfac)<sub>2</sub>(py-im)] (**5**) (0.053 mM) + 1 equiv of [N(tol)<sub>3</sub>]PF<sub>6</sub> in MeCN to generate Ru<sup>III</sup>(hfac)<sub>2</sub>(py-im) (**6**) and (b) further titration of **6** + 1 equiv of TEMPO-H to produce Ru<sup>II</sup>(hfac)<sub>2</sub>(py-imH) (**4**).

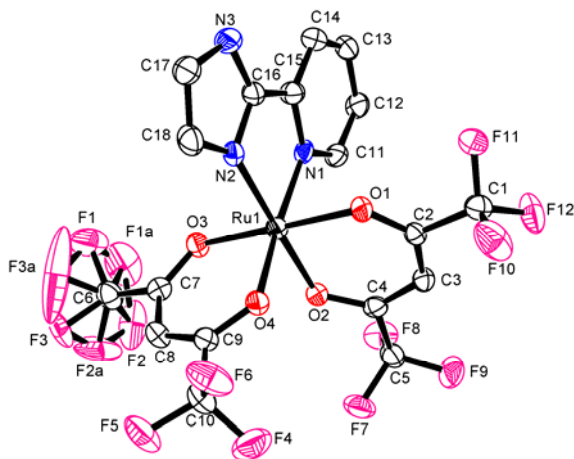

**Figure S5.** ORTEP drawing of [Ru<sup>II</sup>(hfac)<sub>2</sub>(py-im)]<sup>-</sup> (**5**) showing both the major 80% (F1, F2, and F3) and minor 20% (F1A, F2A, and F3A) occupancies of the disordered CF<sub>3</sub> group.
